# Supplementary material for: A PEDOT based graft copolymer with enhanced electronic stability
Source: Royal Society of Chemistry journal article supplement (doi:10.1039/d4mh00654b), 2024-01-01
Supplement: d4mh00654b1.pdf [file d4mh00654b1.pdf]

Supporting information

**A PEDOT based graft copolymer with enhanced electronic stability**

*Modi Gu,<sup>a</sup> Lorenzo Travaglini,<sup>a</sup> Daniel Ta,<sup>b</sup> Jonathan Hopkins,<sup>a</sup> Antonio Lauto,<sup>b</sup> Pawel Wagner,<sup>c</sup> Klaudia Wagner,<sup>c</sup> David L. Officer,<sup>c</sup> Damia Mawad<sup>a, d\*</sup>*

*<sup>a</sup> School of Materials Science and Engineering, UNSW Sydney, Sydney, New South Wales 2052, Australia. E-mail: damia.mawad@unsw.edu.au*

*<sup>b</sup> School of Science, Western Sydney University, Locked Bag 1797, Penrith, NSW 2751, Australia*

*<sup>c</sup> Intelligent Polymer Research Institute and ARC Centre of Excellence for Electromaterials Science, University of Wollongong, New South Wales 2522, Australia*

*<sup>d</sup> Australian Centre for NanoMedicine, UNSW Sydney, Sydney, New South Wales 2052, Australia*

**Table S1.** Thickness ( $d$ ) of polymeric films synthesised on ITO and OECT single channel devices.

| Substrate    | Sample name                                                  | Thickness ( $\mu\text{m}$ ) |
|--------------|--------------------------------------------------------------|-----------------------------|
| ITO          | Poly(EDOTS- <i>g</i> -EDOT) ( $d_{\text{graft-copolymer}}$ ) | $1.093 \pm 0.209$           |
|              | PEDOTS ( $d_{\text{PEDOTS}}$ )                               | $1.064 \pm 0.204$           |
|              | Grafted PEDOT layer ( $d_{\text{grafted-PEDOT-layer}}$ )     | $0.029 \pm 0.008$           |
| OECT devices | Poly(EDOTS- <i>g</i> -EDOT)                                  | $1.082 \pm 0.263$           |
|              | SC-PEDOT:PSS                                                 | $1.794 \pm 0.171$           |
|              | EP-PEDOT:PSS                                                 | $9.374 \pm 0.347$           |

**Table S2.** Poly(EDOTS-*g*-EDOT), EP-PEDOT:PSS, and SC-PEDOT:PSS XPS fitting parameters for S  $2p_{3/2}$ .<sup>1-3</sup>

| Components                        | Poly(EDOTS- <i>g</i> -EDOT) |                     |           |
|-----------------------------------|-----------------------------|---------------------|-----------|
|                                   | FWHM                        | Binding energy (eV) | Ratio (%) |
| Sulfur in thiophene ring          | 0.9                         | 163.8               | 37        |
| Oxidized sulfur in thiophene ring | 1.2                         | 165.3               | 16        |
| Sulfur from sulfone group         | 1.2                         | 168.0               | 2         |
| Sulfur from sulfonate group       | 1.2                         | 168.4               | 45        |
| Components                        | EP-PEDOT:PSS                |                     |           |
|                                   | FWHM                        | Binding energy (eV) | Ratio (%) |
| Sulfur in thiophene ring          | 0.9                         | 162.4               | 9         |
| Oxidized sulfur in thiophene ring | 1.2                         | 164.1               | 4         |
| Sulfur from sulfone group         | -                           | -                   | -         |
| Sulfur from sulfonate group       | 1.2                         | 166.7               | 87        |
| Components                        | SC-PEDOT:PSS                |                     |           |
|                                   | FWHM                        | Binding energy (eV) | Ratio (%) |
| Sulfur in thiophene ring          | 1.0                         | 164.0               | 19        |
| Oxidized sulfur in thiophene ring | 1.2                         | 165.3               | 8         |
| Sulfur from sulfone group         | -                           | -                   | -         |
| Sulfur from sulfonate group       | 1.2                         | 168.1               | 73        |

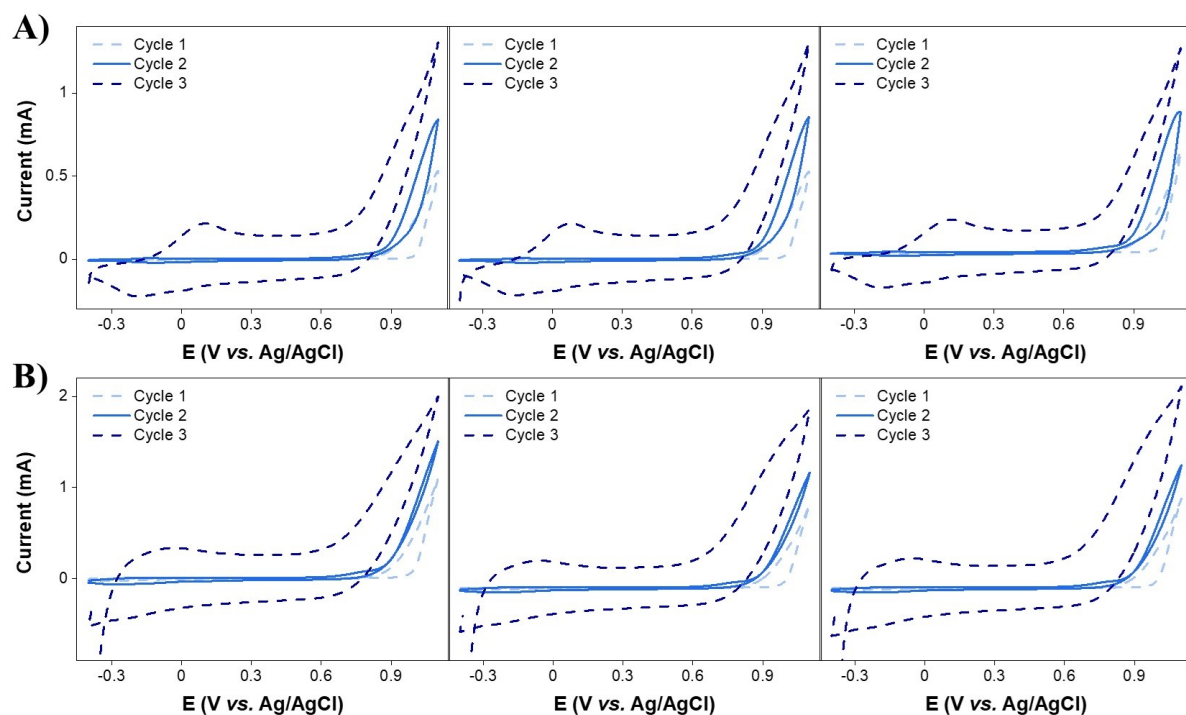

**Figure S1:** CV curves of electropolymerization of P(EDOTS-g-EDOT): A) repeats of 3 samples synthesised on IDME devices, and B) repeats of 3 samples synthesised on ITO substrates. The voltammograms were recorded by applying 2 cycles from  $-0.4$  V to  $+1.1$  V with a scan rate of  $10 \text{ mV.s}^{-1}$  to electrodeposit PEDOTS (labelled as cycle 1 and cycle 2 in the legend), followed by one cycle from  $-0.4$  V to  $+1.1$  V with a scan rate of  $100 \text{ mV.s}^{-1}$  to electrodeposit PEDOT (labelled as cycle 3 in the legend).

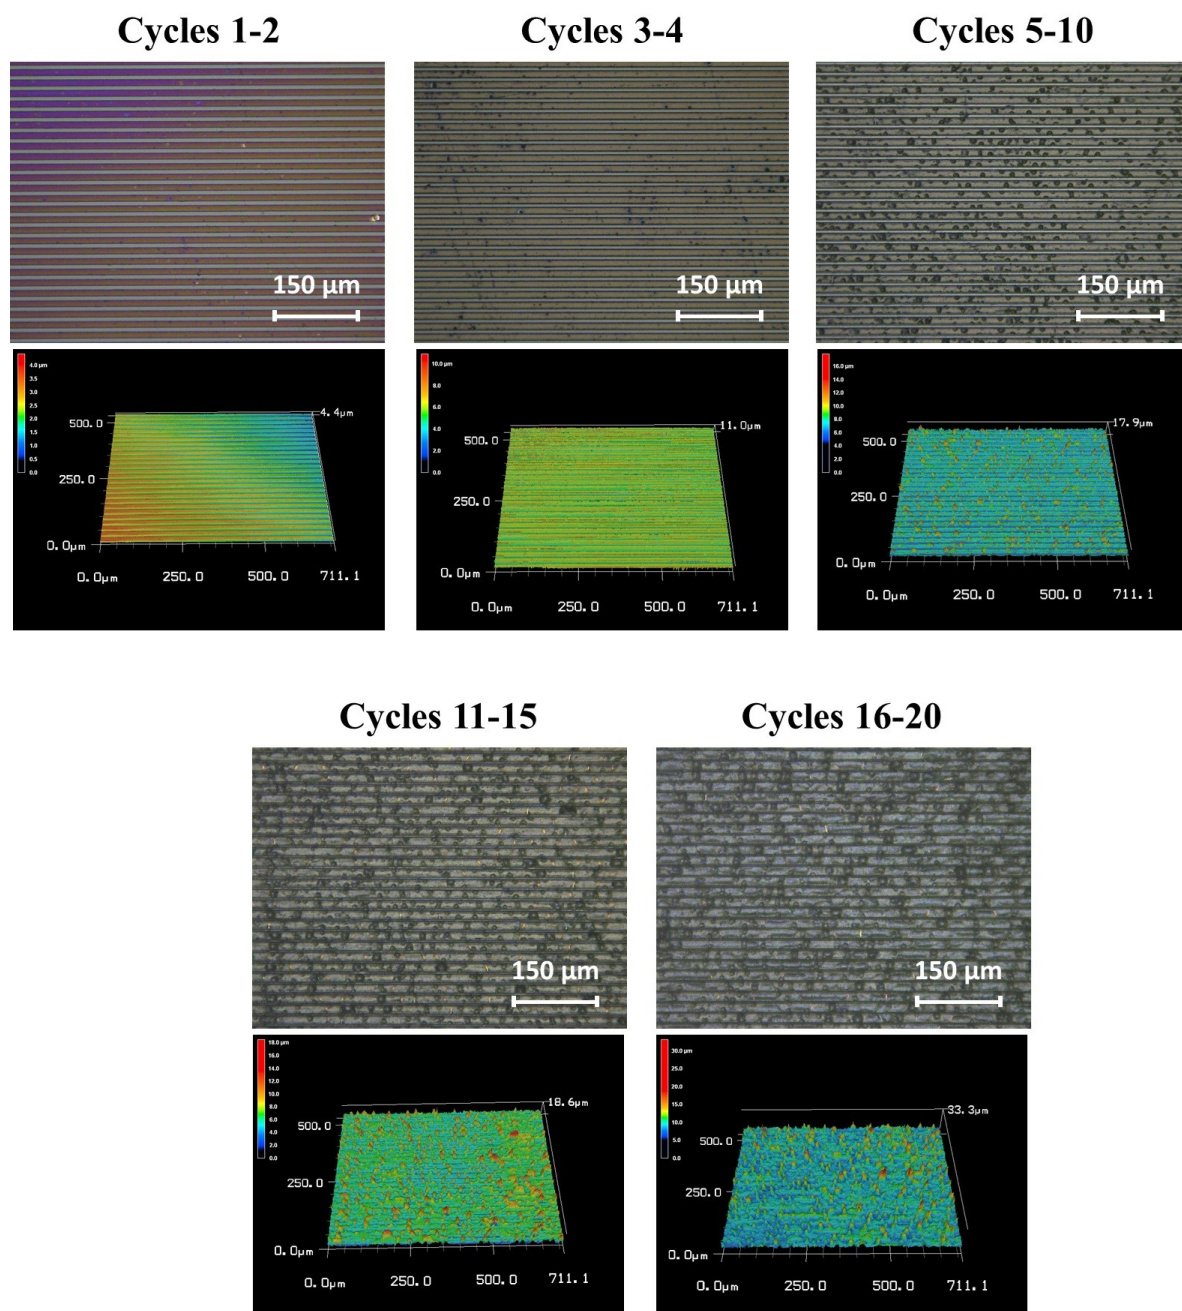

**Figure S2.** Laser confocal microscopy images taken after cycles 2, 4, 10, 15, and 20 to assess the extent of PEDOT:PSS coverage by electropolymerization on the IDME surface.

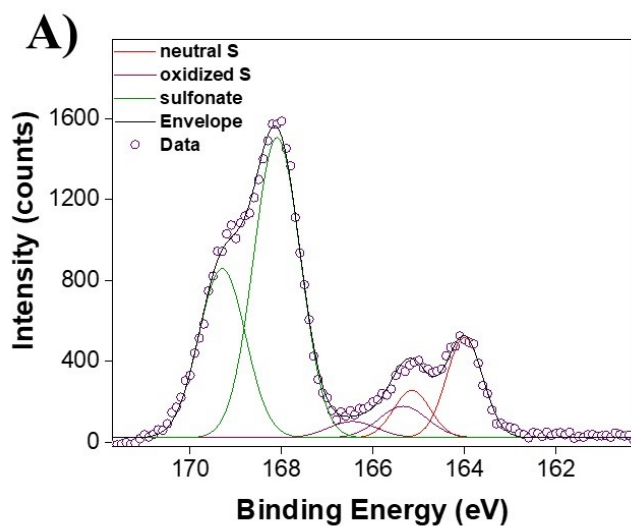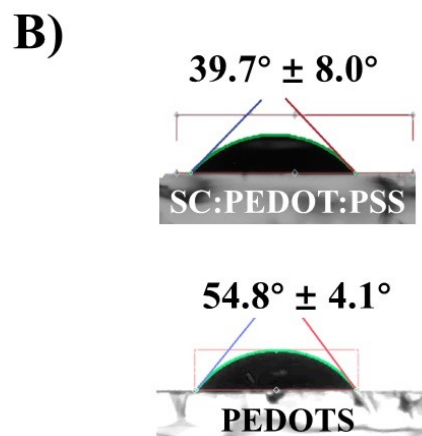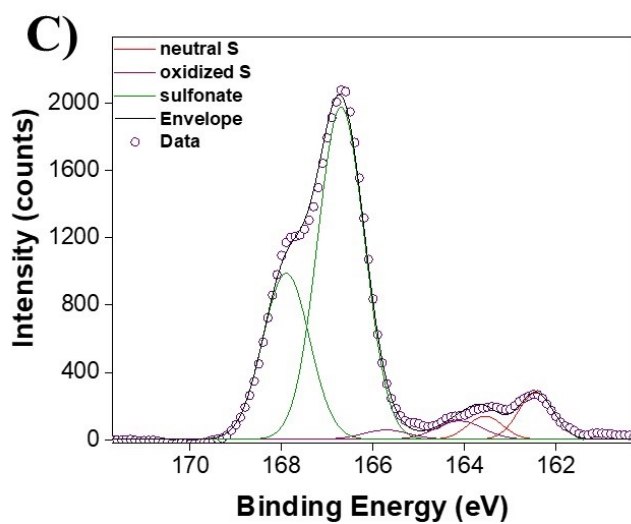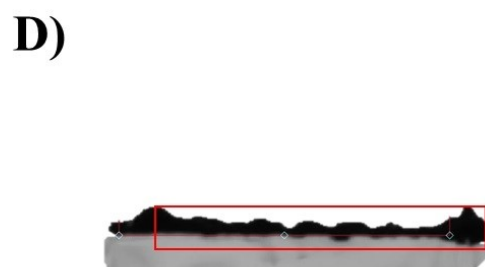

**Figure S3.** XPS analysis of S 2p spectra of A) SC-PEDOT:PSS and C) EP-PEDOT:PSS. Contact angle measurements of B) SC-PEDOT:PSS and PEDOTS that had no grafted PEDOT on its surface, and D) EP-PEDOT:PSS films.

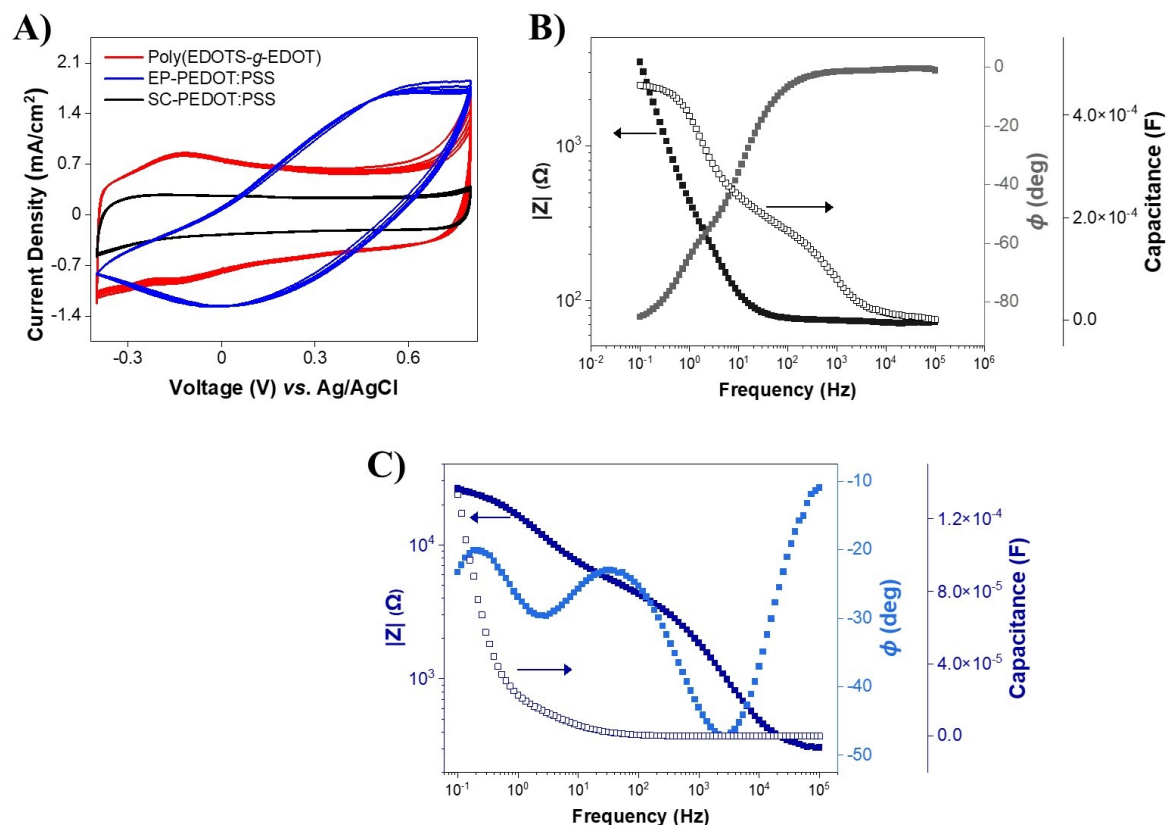

**Figure S4.** A) Cyclic voltammetry of poly(EDOTS-*g*-EDOT) (red line), EP-PEDOT:PSS (blue line) and SC-PEDOT:PSS (black line) electropolymerized and measured at a scan rate of  $50 \text{ mV} \cdot \text{s}^{-1}$  in aqueous electrolyte vs. Ag/AgCl for 6 cycles. Bode, phase angle and capacitance plots of B) SC-PEDOT:PSS and C) EP-PEDOT:PSS under an applied voltage of +0.4 V in aqueous electrolyte vs. Ag/AgCl with a frequency range from 100 mHz to 100 kHz.

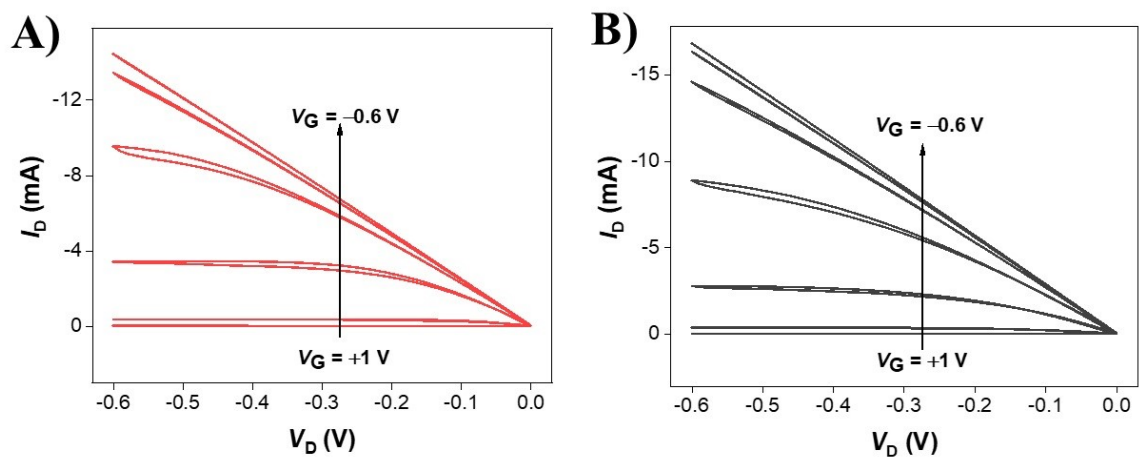

**Figure S5.** Output curves of A) poly(EDOTS-g-EDOT) (red line), and B) SC-PEDOT:PSS (black line) under gate voltage  $V_G$  shift from +1.0 V to -0.6 V with a voltage step of 0.2 V. The gate electrode is an Ag/AgCl reference electrode, and the electrolyte is 0.1 M NaCl aqueous solution.

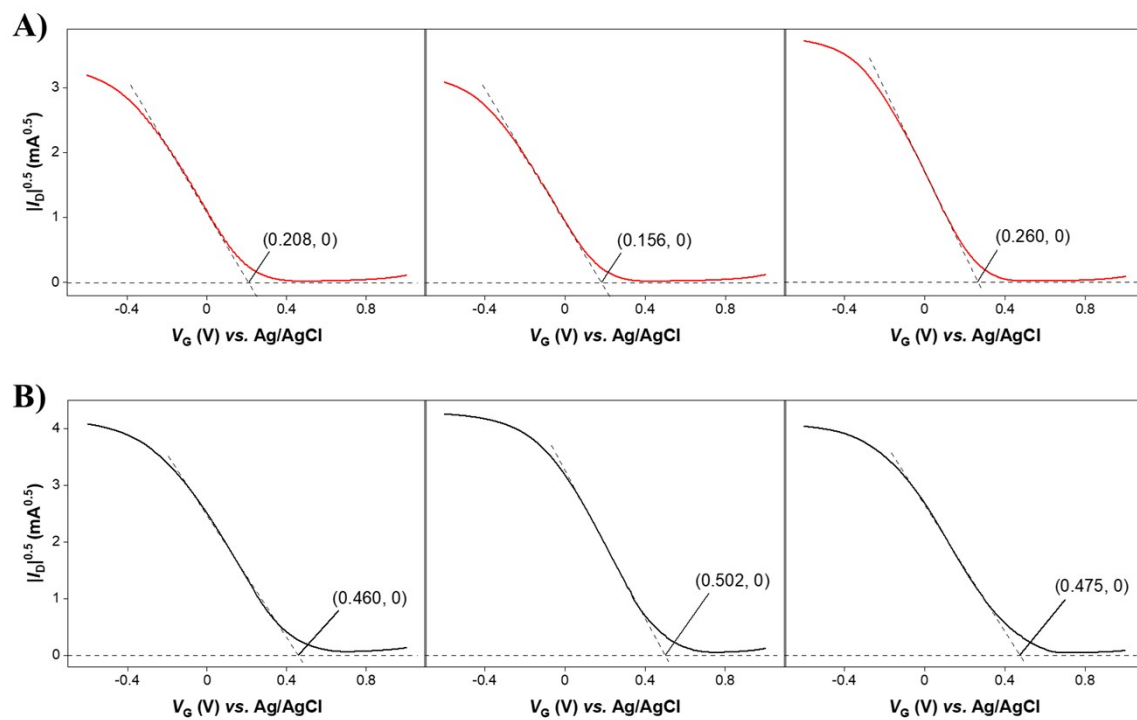

**Figure S6.** Threshold voltage extraction of A) poly(EDOT-g-EDOT) and B) SC-PEDOT:PSS. Three repeat devices are shown for each polymeric film.

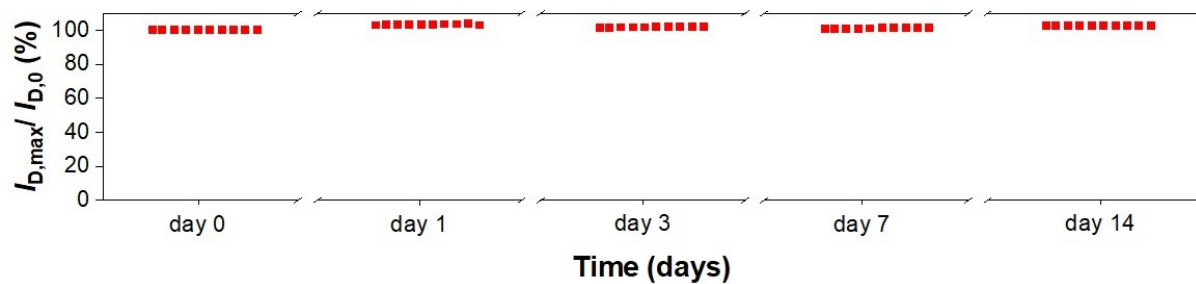

**Figure S7:** ‘Intermittent’ ON/OFF stability of poly(EDOTS-*g*-EDOT) OECT devices left soaking in the electrolyte and measured at day 0, 1, 3, 7 and 14.  $I_{D,max}$  is the maximum drain current at  $-0.4$  V determined for every 5<sup>th</sup> ON/OFF cycle.  $I_{D,0}$  is the maximum drain current determined for the 1<sup>st</sup> ON/OFF cycle measured at day 0.

## References:

- 1 H. Yoon, J. Y. Hong and J. Jang, *Small*, 2007, **3**, 1774–1783.
- 2 S. Marciniak, X. Crispin, K. Uvdal, M. Trzcinski, J. Birgerson, L. Groenendaal, F. Louwet and W. R. Salaneck, *Synth Met*, 2004, **141**, 67–73.
- 3 B. J. Lindberg, K. Hamrin, G. Johansson, U. Gelius, A. Fahlman, C. Nordling and K. Siegbahn, *Phys Scr*, 1970, **1**, 286–298.
